# Supplementary material
Source: publisher figshare collection journal article supplement (https://acs.figshare.com/ndownloader/files/17278307)
Supplement: Supplementary file 1 [file 17278307]

# Supporting Information for

## A ferromagnetically coupled, bell-shaped [Ni<sub>4</sub>Gd<sub>5</sub>] cage

Foteini E. Kakaroni,<sup>‡</sup> Demetrios I. Tzimopoulos,<sup>†</sup> Hector W. L. Fraser,<sup>§</sup> Milosz Siczek,<sup>‡</sup>  
Tadeusz Lis,<sup>‡</sup> Marco Evangelisti,<sup>\*#</sup> Euan K. Brechin<sup>\*§</sup> and Constantinos J. Milios<sup>\*‡</sup>

<sup>‡</sup>*Department of Chemistry, The University of Crete, Voutes, 71003, Herakleion, Greece. E-mail: [komil@uoc.gr](mailto:komil@uoc.gr)*

<sup>†</sup>*Department of Chemistry, Aristotle University of Thessaloniki, 54124 Thessaloniki, Greece.*

<sup>§</sup>*EaStCHEM School of Chemistry, The University of Edinburgh, David Brewster Road, Edinburgh, EH9 3FJ, UK. E-mail: [ebrechin@staffmail.ed.ac.uk](mailto:ebrechin@staffmail.ed.ac.uk)*

<sup>‡</sup>*Department of Chemistry, University of Wrocław, 50-283 Wrocław, Poland.*

<sup>#</sup>*Instituto de Ciencia de Materiales de Aragón (ICMA), CSIC – Universidad de Zaragoza, 50009 Zaragoza, Spain. E-mail: [evange@unizar.es](mailto:evange@unizar.es)*

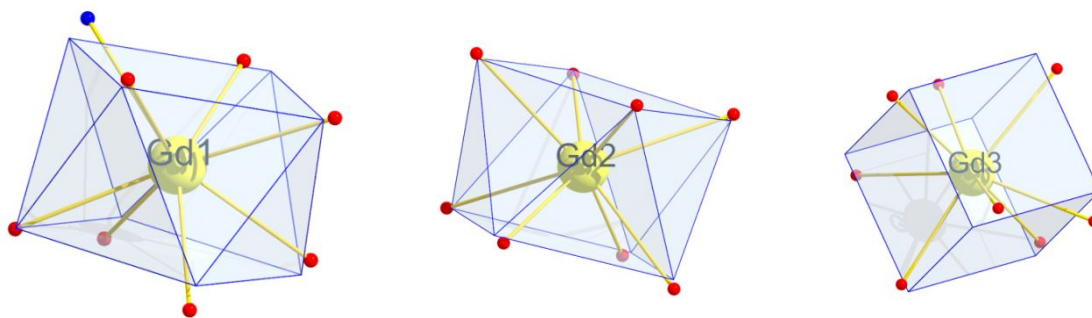

**Fig. S1.** The coordination geometries of the Gd(III) metal centers in **1**: Gd1 - Square antiprism; Gd2 - Square antiprism; Gd3 - Cube.

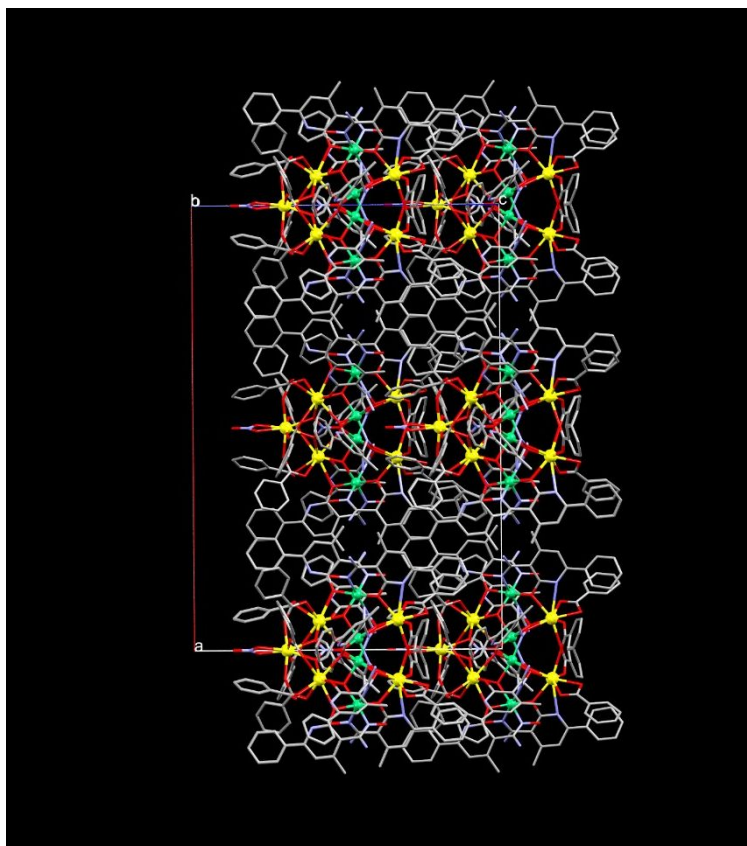

**Fig. S2.** View of the crystal packing of **1** down the *b* axis. H-atoms and solvate molecules have been omitted for clarity.

**Table S1.** Continuous Shape Measures Calculation for Structure [ML8].

|     | OP-8   | HPY-8  | HBPY-8 | CU-8   | SAPR-8 | TDD-8 | JGBF-8 | JETBPY-8 | JBTPR-8 |
|-----|--------|--------|--------|--------|--------|-------|--------|----------|---------|
| Gd1 | 4.173  | 19.610 | 16.128 | 12.163 | 2.759  | 3.411 | 33.060 | 16.215   | 27.614  |
| Gd2 | 28.958 | 23.341 | 16.728 | 10.148 | 0.475  | 2.176 | 15.350 | 27.291   | 1.757   |
| Gd3 | 31.176 | 24.440 | 6.350  | 6.003  | 7.028  | 6.659 | 7.167  | 22.539   | 6.379   |

OP-8: Octagon; HPY-8: Heptagonal pyramid; HBPY-8: Hexagonal bipyramid; CU-8: Cube; SAPR-8: Square antiprism; TDD-8: Triangular dodecahedron; JGBF-8: Johnson gyrobifastigium J26; JETBPY-8: Johnson elongated triangular bipyramid J14; JBTPR-8: Biaugmented trigonal prism J50.

SHAPE is a program for the stereochemical analysis of molecular fragments and geometries. It calculates continuous shape measures of a set of points (e.g. atomic positions) relative to the vertices of ideal polygons or polyhedral, either centered or non-centered. In addition, it also calculates deviations from minimal distortion paths and polyhedral interconversion generalized coordinates. For more information see the following references:

- Pinsky M.; Avnir D. Continuous Symmetry Measures. 5. The Classical Polyhedra. *Inorg. Chem.* **1998**, *37*, 5575-5582.
- Casanova D.; Cirera J.; Llunell M.; Alemany P.; Avnir D.; Alvarez S. Minimal Distortion Pathways in Polyhedral Rearrangements. *J. Am. Chem. Soc.* **2004**, *126*, 1755-1763.
- Cirera J.; Ruiz E.; Alvarez S. Shape and Spin State in Four-Coordinate Transition-Metal Complexes: The Case of the  $d^6$  Configuration. *Chem. Eur. J.* **2006**, *12*, 3162 – 3167.

**X-ray diffraction.** At first, a crystal of **1** was mounted on the diffractometer at 100 K under a cold nitrogen gas stream supplied by an Oxford Cryostream. However, preliminary data collection showed multi-twinning and crystal cracking. Therefore a new crystal was coated in perfluoropolyalkylether oil (1800 cSt) and mounted on a thin quartz fiber attached to a copper pin at room temperature and slowly cooled to 230 K. Data collection were performed at this temperature. Upon further cooling to 80 K the crystal cracked and data obtained at this temperature were not suitable for publication. The same procedure was applied to complex **2**; in this case crystal did not crack and it was possible to obtain diffraction data at 100 K.

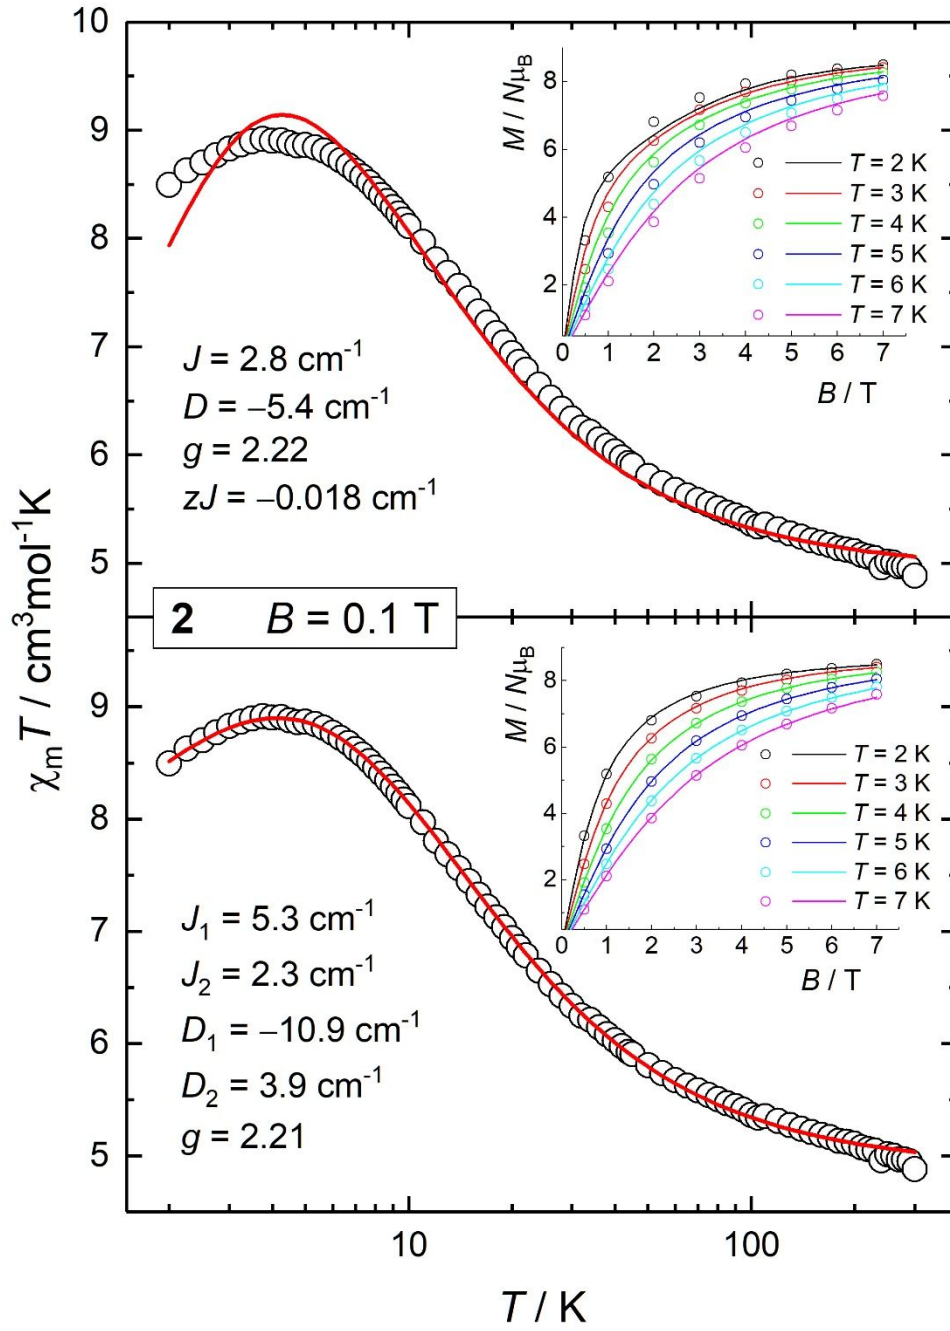

**Fig. S3.** Comparison between fit results (solid lines) of the susceptibility and magnetization data (insets) of **2** for the "1- $J$  + 1- $D$ " model (top) and the "2- $J$  + 2- $D$ " model (bottom), respectively. Note that, when adopting the "1- $J$  + 1- $D$ " model, the intermolecular interaction term  $zJ'$  is needed to account for the  $\chi_m T$  decrease at the lowest temperatures.

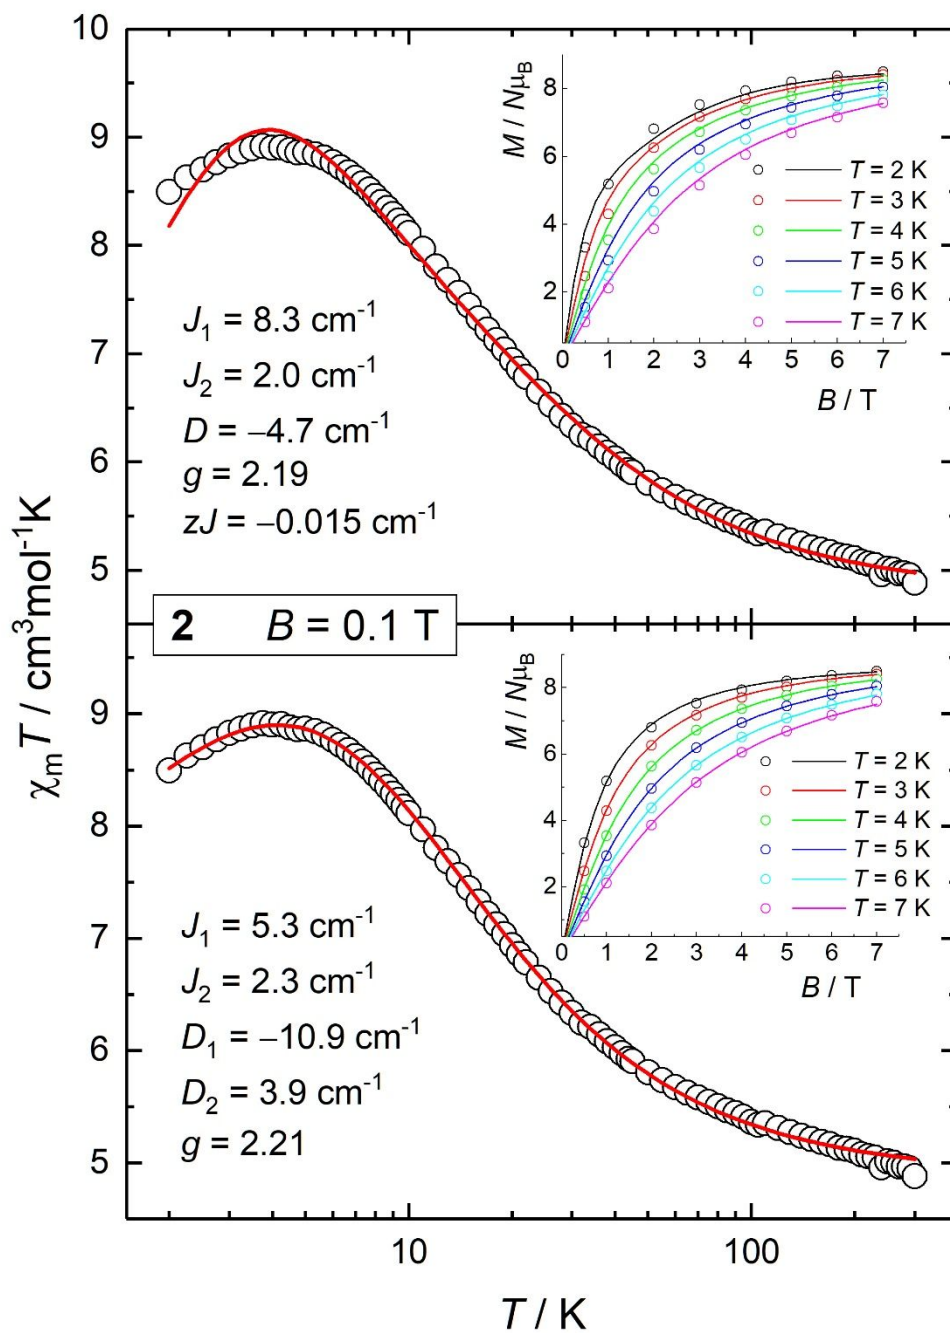

**Fig. S4.** Comparison between fit results (solid lines) of the susceptibility and magnetization data (insets) of **2** for the “2- $J$  + 1- $D$ ” model (top) and the “2- $J$  + 2- $D$ ” model (bottom), respectively. Note that, when adopting the “2- $J$  + 1- $D$ ” model, the intermolecular interaction term  $zJ'$  is needed to account for the  $\chi_m T$  decrease at the lowest temperatures.

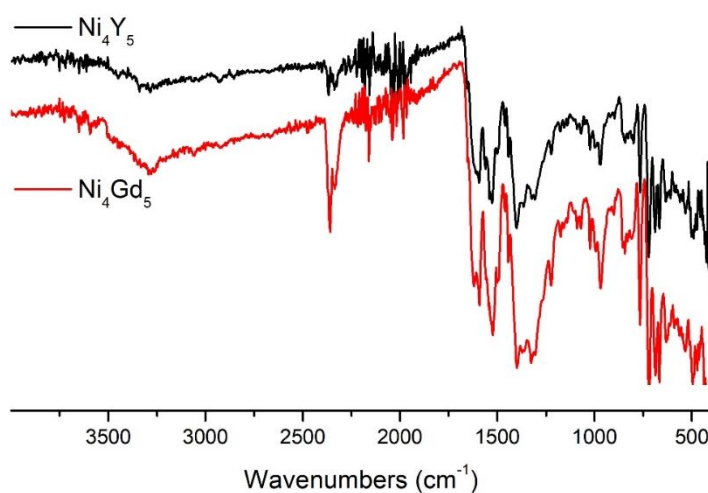

**Fig. S5.** FTIR-ATR spectra of **1** and **2** in the 4000-440  $\text{cm}^{-1}$  range (on a microcrystalline sample).

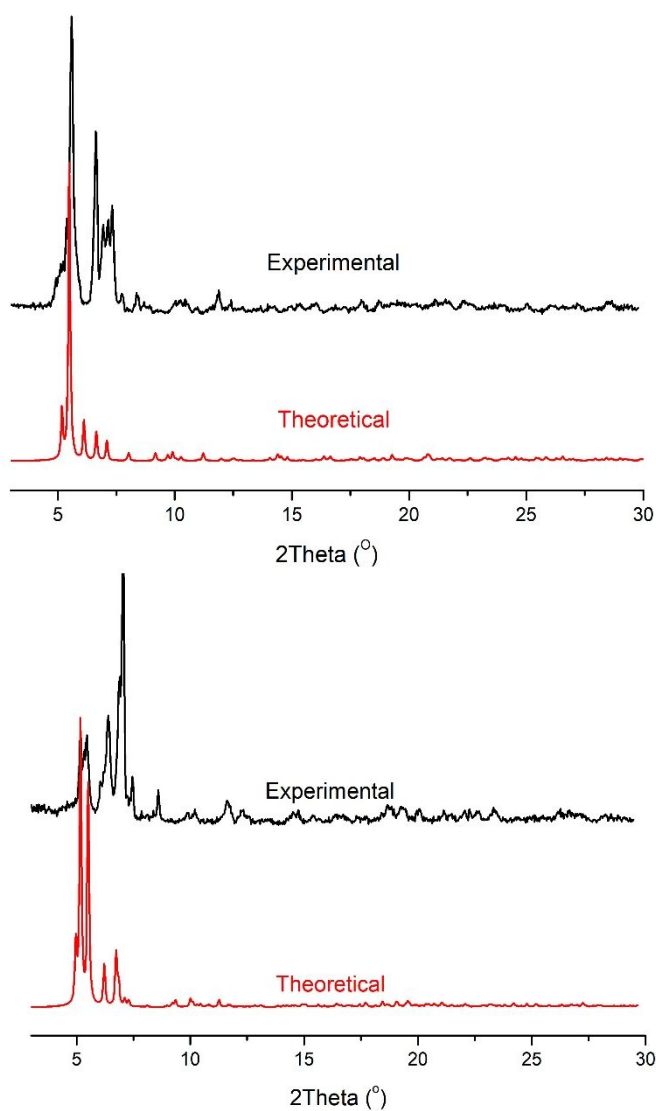

**Fig. S6.** Powder XRD (Cu source) diagrams' comparison between the experimental and theoretical patterns for complexes **1** (top) and **2** (bottom) in the 3-30°  $2\theta$  range. The difference

in the peaks' intensity is probably due to partial decomposition of the crystals caused by loosing of solvate molecules.

**Table S2.** Crystallographic data for complexes **1** and **2**.

|                                                   | <b>1</b> ·13.6MeCN·H <sub>2</sub> O                                                                            | <b>2</b> ·3H <sub>2</sub> O                                                                                             |
|---------------------------------------------------|----------------------------------------------------------------------------------------------------------------|-------------------------------------------------------------------------------------------------------------------------|
| Formula <sup>a</sup>                              | C <sub>201.2</sub> H <sub>189.8</sub> ClGd <sub>5</sub> N <sub>39.6</sub> Ni <sub>4</sub><br>O <sub>44.5</sub> | C <sub>174</sub> H <sub>155</sub> Cl <sub>0.5</sub> N <sub>26.5</sub><br>Ni <sub>4</sub> O <sub>49</sub> Y <sub>5</sub> |
| <i>M</i> <sub>w</sub>                             | 4931.06                                                                                                        | 4098.35                                                                                                                 |
| Crystal System                                    | orthorhombic                                                                                                   | orthorhombic                                                                                                            |
| Space group                                       | Aba2                                                                                                           | Pca2 <sub>1</sub>                                                                                                       |
| <i>a</i> /Å                                       | 34.062(18)                                                                                                     | 33.774(8)                                                                                                               |
| <i>b</i> /Å                                       | 28.836(8)                                                                                                      | 26.005(7)                                                                                                               |
| <i>c</i> /Å                                       | 23.494(7)                                                                                                      | 22.958(6)                                                                                                               |
| <i>V</i> /Å <sup>3</sup>                          | 23076(13)                                                                                                      | 20164(9)                                                                                                                |
| <i>Z</i>                                          | 4                                                                                                              | 4                                                                                                                       |
| <i>T</i> /K                                       | 230                                                                                                            | 100                                                                                                                     |
| $\lambda^b$ /Å                                    | 0.71073                                                                                                        | 0.71073                                                                                                                 |
| <i>D</i> <sub>c</sub> /g cm <sup>-3</sup>         | 1.419                                                                                                          | 1.350                                                                                                                   |
| $\mu$ (Mo-Ka)/ mm <sup>-1</sup>                   | 1.82                                                                                                           | 1.87                                                                                                                    |
| Meas./indep. ( <i>R</i> <sub>int</sub> )<br>refl. | 30634/16426 (0.053)                                                                                            | 76800/33809 (0.104)                                                                                                     |
| Obs. refl. [ <i>I</i> > 2σ( <i>I</i> )]           | 13220                                                                                                          | 11993                                                                                                                   |
| <i>wR</i> <sup>2</sup> <sub>c,d</sub>             | 0.218                                                                                                          | 0.420                                                                                                                   |
| Data/parameters/restraints                        | 16426/1267/136                                                                                                 | 33809/1930/674                                                                                                          |
| <i>R</i> <sup>1</sup> <sub>d,e</sub>              | 0.077                                                                                                          | 0.122                                                                                                                   |
| Goodness of fit on <i>F</i> <sup>2</sup>          | 1.08                                                                                                           | 1.03                                                                                                                    |
| $\Delta\rho_{\text{max,min}}$ / eÅ <sup>-3</sup>  | 2.20, -2.64                                                                                                    | 1.02, -0.48                                                                                                             |

<sup>a</sup> Including solvate molecules Mo-K $\alpha$  radiation, graphite monochromator. <sup>c</sup>  $wR2 = [\Sigma w(|F_o|^2 - |F_c|^2)|^2 / \Sigma w|F_o|^2]^1/2$ . <sup>d</sup> For observed data. <sup>e</sup>  $R1 = \Sigma ||F_o| - |F_c|| / \Sigma |F_o|$ .
